# Supplementary material
Source: PubMed Central journal article supplement (PMC6175802)
Supplement: jcsm.14.10.1773s1.pdf [file jcsm.14.10.1773s1.pdf]

**Table S1. Baseline characteristics of patients who completed versus patients who did not complete both baseline and 6-month sleep studies and echocardiograms**

| Characteristics                                | Completed all studies<br>(n = 101) | Did not complete studies<br>(n = 77) | p value |
|------------------------------------------------|------------------------------------|--------------------------------------|---------|
| <b>Demographics</b>                            |                                    |                                      |         |
| Age in years, mean (SD)                        | 53.8 (9.0)                         | 55.2 (8.8)                           | 0.298   |
| Male gender (n, %)                             | 99 (98.0)                          | 73 (94.8)                            | 0.405   |
| Ethnicity (n, %)                               |                                    |                                      | 0.938   |
| Chinese                                        | 57 (56.4)                          | 43 (55.8)                            |         |
| Malay                                          | 24 (23.8)                          | 19 (24.7)                            |         |
| Indian                                         | 17 (16.8)                          | 14 (18.2)                            |         |
| Others                                         | 3 (3.0)                            | 1 (1.3)                              |         |
| <b>Anthropometrics, mean (SD)</b>              |                                    |                                      |         |
| Height (m)                                     | 167.8 (7.5)                        | 167.8 (6.3)                          | 0.991   |
| Weight (kg)                                    | 72.5 (13.2)                        | 72.7 (13.7)                          | 0.934   |
| Body mass index, baseline (kg/m <sup>2</sup> ) | 25.6 (3.7)                         | 25.7 (4.2)                           | 0.931   |
| Neck circumference (cm)                        | 36.7 (4.0)                         | 36.9 (4.2)                           | 0.796   |
| Waist circumference (cm)                       | 89.9 (11.9)                        | 90.3 (9.2)                           | 0.800   |
| <b>Cardiovascular risk factors (n, %)</b>      |                                    |                                      |         |
| Smoking                                        | 54 (53.5)                          | 47 (61.0)                            | 0.361   |
| Hypertension                                   | 32 (31.7)                          | 40 (52.0)                            | 0.009   |
| Diabetes mellitus                              | 23 (22.8)                          | 28 (36.4)                            | 0.065   |
| Insulin-dependent diabetes mellitus            | 2 (2.0)                            | 5 (6.5)                              | 0.242   |
| Hyperlipidaemia                                | 74 (73.3)                          | 62 (80.5)                            | 0.289   |
| Family history of coronary artery disease      | 10 (9.9)                           | 4 (5.2)                              | 0.277   |
| <b>Concomitant conditions (n, %)</b>           |                                    |                                      |         |
| Previous stroke                                | 1 (1.0)                            | 4 (5.2)                              | 0.167   |
| Chronic kidney disease                         | 3 (3.0)                            | 1 (1.3)                              | 0.635   |
| <b>Discharge medications (n, %)</b>            |                                    |                                      |         |
| Aspirin                                        | 101 (100.)                         | 74 (96.1)                            | 0.079   |
| ADP receptor antagonist                        | 100 (99.0)                         | 76 (98.7)                            | 1.000   |
| β-blocker                                      | 92 (91.1)                          | 66 (85.7)                            | 0.339   |
| ACEI/ARB                                       | 67 (66.3)                          | 62 (80.5)                            | 0.042   |
| Statin                                         | 99 (98.0)                          | 76 (98.7)                            | 1.000   |
| Ezetimibe                                      | 1 (1.0)                            | 0 (0.0)                              | 1.000   |
| Fibrate                                        | 1 (1.0)                            | 1 (1.3)                              | 1.000   |

ACEI = angiotensin-converting enzyme inhibitor; ADP = adenosine diphosphate; ARB = angiotensin receptor blocker; IQR = interquartile range

**Table S2. Angiographic characteristics and infarct size**

| Characteristics                                                                                                                                                                           | Sleep apnoea (n = 58) |                      |                              | p value |
|-------------------------------------------------------------------------------------------------------------------------------------------------------------------------------------------|-----------------------|----------------------|------------------------------|---------|
|                                                                                                                                                                                           | OSA<br>(n = 46)       | CSA<br>(n = 12)      | Non-sleep apnoea<br>(n = 43) |         |
| Single vessel disease (n, %)                                                                                                                                                              | 23 (50)               | 6 (50)               | 26 (61)                      | 0.566   |
| Culprit vessel (n, %)                                                                                                                                                                     |                       |                      |                              | 0.282   |
| Left anterior descending artery                                                                                                                                                           | 38 (82.6)             | 7 (58.3)             | 29 (67.4)                    |         |
| Left circumflex artery                                                                                                                                                                    | 1 (2.2)               | 0 (0.0)              | 2 (4.7)                      |         |
| Right coronary artery                                                                                                                                                                     | 6 (13.0)              | 5 (41.7)             | 9 (20.9)                     |         |
| Left main coronary artery                                                                                                                                                                 | 1 (2.2)               | 0 (0.0)              | 3 (7.0)                      |         |
| Baseline TIMI flow (n, %)                                                                                                                                                                 |                       |                      |                              | 0.653   |
| 0                                                                                                                                                                                         | 31 (67.4)             | 12 (100.0)           | 29 (67.4)                    |         |
| 1                                                                                                                                                                                         | 5 (10.9)              | 0 (0.0)              | 5 (11.6)                     |         |
| 2                                                                                                                                                                                         | 3 (6.5)               | 0 (0.0)              | 3 (7.0)                      |         |
| 3                                                                                                                                                                                         | 7 (15.2)              | 0 (0.0)              | 6 (14.0)                     |         |
| Final TIMI flow (n, %)                                                                                                                                                                    |                       |                      |                              | 0.482   |
| 1                                                                                                                                                                                         | 0 (0.0)               | 0 (0.0)              | 1 (2.3)                      |         |
| 2                                                                                                                                                                                         | 1 (2.2)               | 1 (8.3)              | 1 (2.3)                      |         |
| 3                                                                                                                                                                                         | 45 (97.8)             | 11 (91.7)            | 41 (95.4)                    |         |
| Incomplete revascularization (n, %)                                                                                                                                                       | 11 (23.9)             | 1 (8.3)              | 7 (16.3)                     | 0.449   |
| Mean door-to-balloon time, minutes (SD)                                                                                                                                                   | 54.1 (31.1)           | 46.6 (16.3)          | 51.1 (24.5)                  | 0.698   |
| Median peak CK, IU/L (IQR)                                                                                                                                                                | 1983<br>(1162-3472)   | 3906<br>(2386 –7829) | 3231<br>(943-4831)           | 0.120   |
| Median peak CKMB, IU/L (IQR)                                                                                                                                                              | 127<br>(58 – 254)     | 281<br>(127 – 300)   | 161<br>(51 – 300)            | 0.156   |
| Median peak Troponin I, ng/L (IQR)                                                                                                                                                        | 77<br>(38 – 80)       | 80<br>(77 – 80)      | 80<br>(32 – 80)              | 0.365   |
| TIMI = Thrombolysis in Myocardial Infarction; OSA = obstructive sleep apnoea; CSA = central sleep apnoea; SD = Standard Deviation; CK = Creatine Kinase; CK = Creatine Kinase-MB fraction |                       |                      |                              |         |
